# Supplementary material
Source: Springer Nature journal article supplement (https://www.springermedizin.de/resource/supplementary/13075_2012_3656_MOESM2_ESM.pdf/9695066)

## IL-4

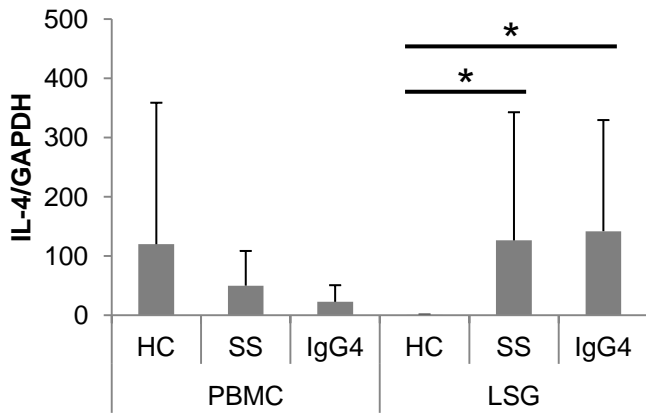

## IL-13

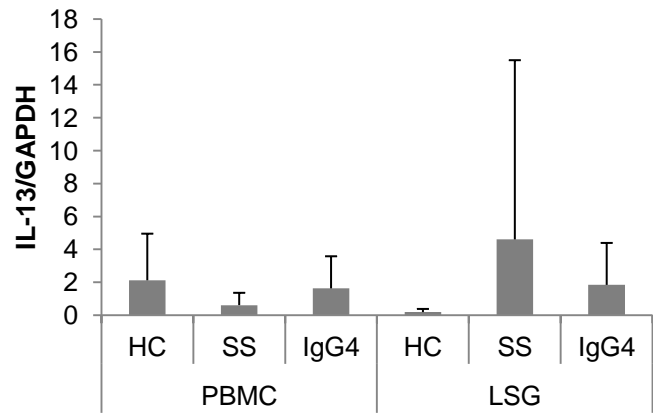

## IL-10

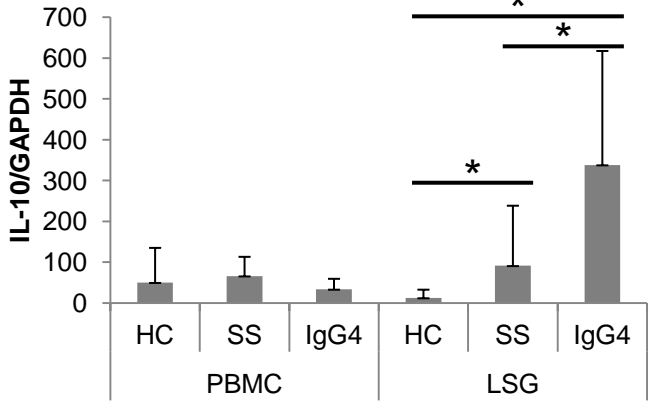

## TGFβ

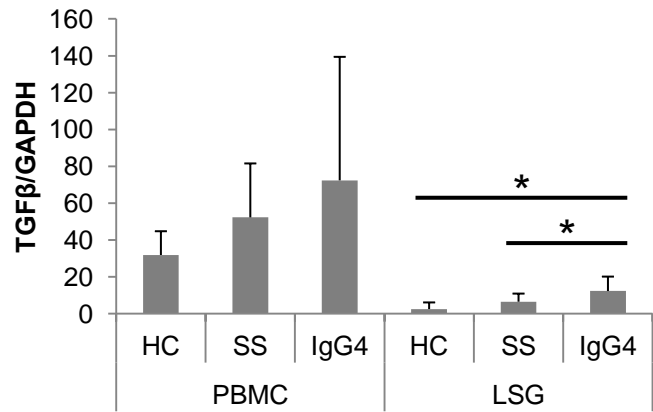

## GATA3

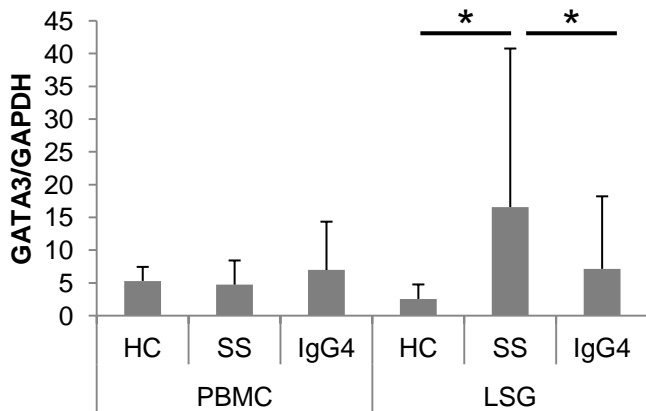

## Foxp3

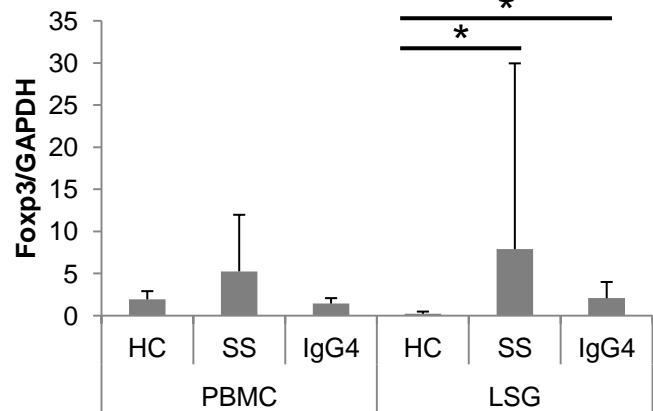

Supplement: MOESM2 [file 9695066]
